# Supplementary material for: Do all mice smell the same? Chemosensory cues from inbred and wild mouse strains elicit stereotypic sensory representations in the accessory olfactory bulb
Source: PubMed Central journal article supplement (PMC8240315; doi:10.1186/s12915-021-01064-7), 2021-06-28

## Additional File 2 – details of statistical comparisons of responses for different categories

Detailed significance testing of all stimulus sets and subject groups shown in the manuscript. All p-values are obtained using a one-way non-parametric ANOVA (Kruskal-Wallis test, `kruskalwallis` test in MATLAB). For each stimulus set (1,2, or 3 as shown in Figure 1C) and subject group (either BALB/c, C57, or both) we present the results for the raw responses, and the normalized responses. P-values are not corrected for multiple comparisons. P values < 0.05 are highlighted in green. P-values < 0.01 are highlighted in yellow.

The first row in each matrix denotes the p-value for comparison of the 1<sup>st</sup> stimulus with all the others. The second row denotes the p-value of the 2<sup>nd</sup> stimulus with all the others. NaN values are included to avoid duplicate values. The results are also shown graphically. The line compares the stimulus in the left side of the line with a stimulus to its right. If there is a red circle, then there is a difference with  $P < 0.01$ . If there is a black circle, the  $P < 0.05$ . Some of these values are also shown graphically in the main manuscript.

**Stimulus set 1, subject strain: C57**

Raw values

|            |            |            |            |
|------------|------------|------------|------------|
| 9.3592e-01 | 1.4547e-07 | 4.1860e-06 | 5.3071e-08 |
| NaN        | 1.1221e-07 | 2.1263e-06 | 1.9777e-08 |
| NaN        | NaN        | 6.3452e-01 | 4.7383e-01 |
| NaN        | NaN        | NaN        | 2.0839e-01 |

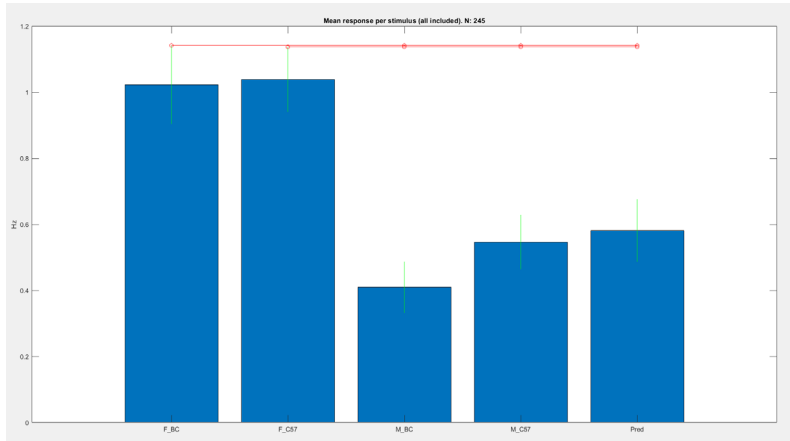

Normalized values

|            |            |            |            |
|------------|------------|------------|------------|
| 7.3655e-01 | 2.6599e-14 | 4.9251e-11 | 4.6758e-11 |
| NaN        | 6.3567e-15 | 9.1342e-12 | 2.3666e-11 |
| NaN        | NaN        | 4.9809e-01 | 7.2998e-01 |
| NaN        | NaN        | NaN        | 3.1589e-01 |

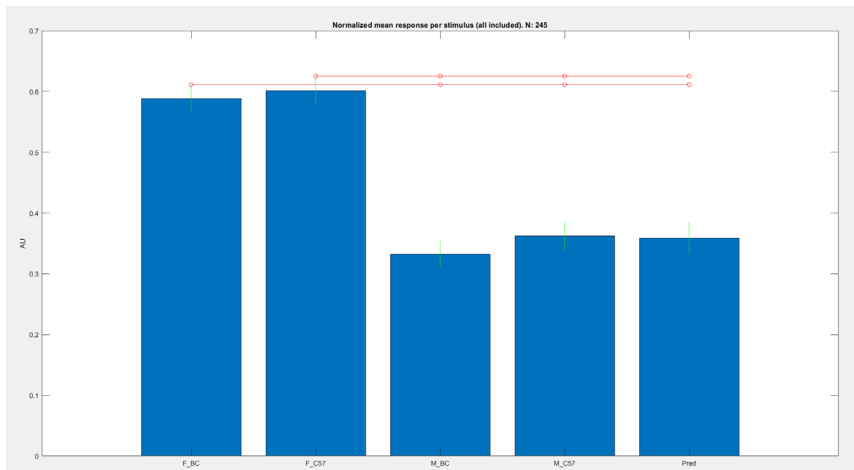

**Stimulus set 1; Subject strain: BC.**

Raw values

|            |            |            |            |
|------------|------------|------------|------------|
| 3.4504e-01 | 2.0621e-01 | 1.7476e-01 | 2.4978e-08 |
| NaN        | 1.9743e-02 | 1.5933e-02 | 2.5092e-11 |
| NaN        | NaN        | 9.1837e-01 | 3.3032e-06 |
| NaN        | NaN        | NaN        | 2.7908e-06 |

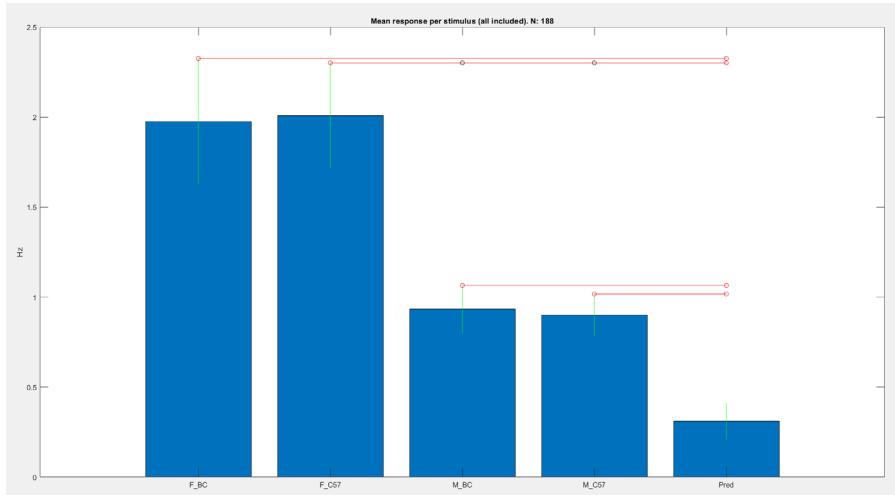

Normalized values

|            |            |            |            |
|------------|------------|------------|------------|
| 2.0095e-02 | 6.3847e-02 | 6.4704e-02 | 1.1076e-10 |
| NaN        | 6.2666e-06 | 4.7858e-06 | 8.8038e-19 |
| NaN        | NaN        | 9.8934e-01 | 3.3170e-07 |
| NaN        | NaN        | NaN        | 9.9045e-08 |

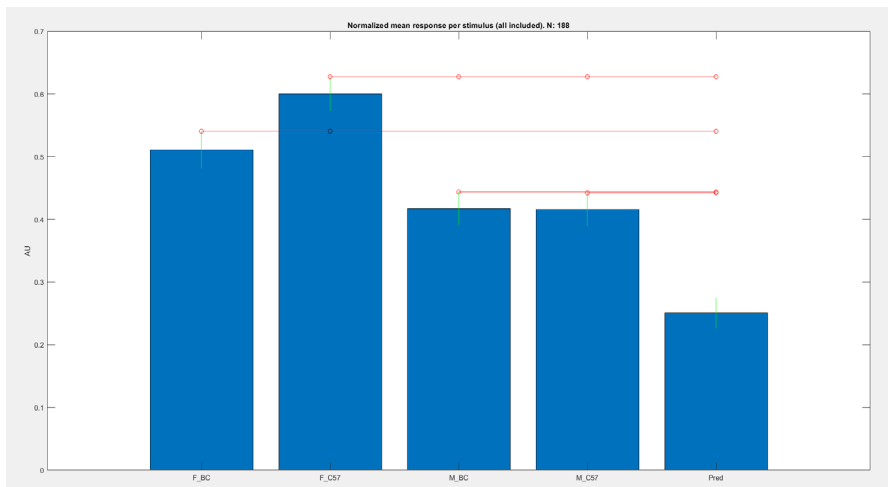

**Stimulus set 1, Subject train: C57 + BC:**

Raw values

|            |            |            |            |
|------------|------------|------------|------------|
| 4.8416e-01 | 2.3820e-06 | 1.4811e-05 | 4.2507e-15 |
| NaN        | 4.4104e-08 | 2.9735e-07 | 3.8434e-18 |
| NaN        | NaN        | 6.9812e-01 | 4.4086e-04 |
| NaN        | NaN        | NaN        | 8.3504e-05 |

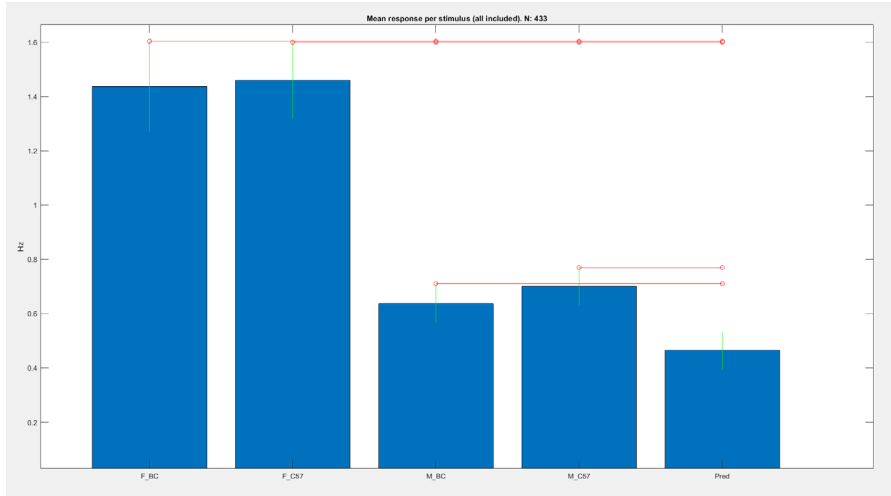

Normalized values

|            |            |            |            |
|------------|------------|------------|------------|
| 7.5797e-02 | 3.9937e-12 | 3.2355e-10 | 1.9030e-20 |
| NaN        | 1.0476e-18 | 3.0783e-16 | 1.1045e-27 |
| NaN        | NaN        | 5.6825e-01 | 3.3630e-04 |
| NaN        | NaN        | NaN        | 2.8372e-05 |

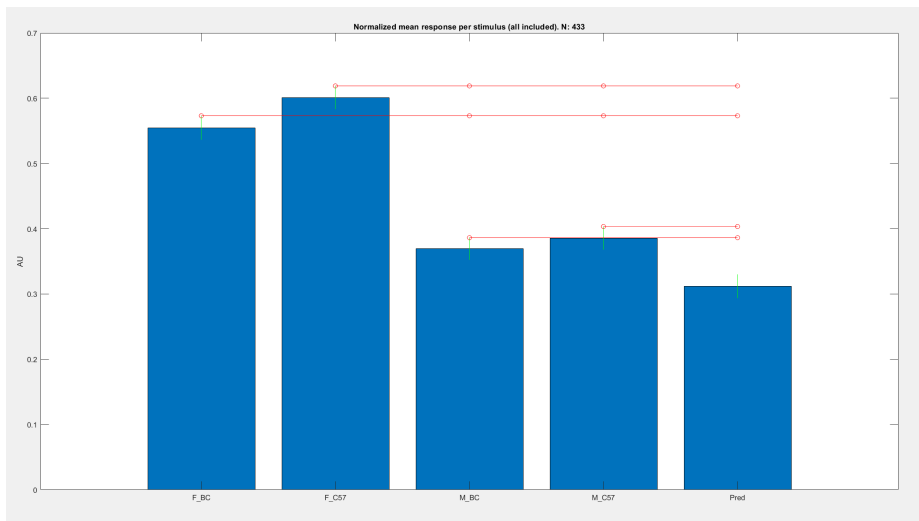

## Stimulus set 2. Subject strain: C57 + BC

### Raw values

|            |            |            |            |            |            |
|------------|------------|------------|------------|------------|------------|
| 9.6087e-01 | 3.7801e-02 | 1.5737e-05 | 3.1216e-06 | 1.9384e-02 | 1.0901e-08 |
| NaN        | 4.3065e-02 | 2.0665e-05 | 3.0740e-06 | 2.0264e-02 | 1.3162e-08 |
| NaN        | NaN        | 2.5696e-02 | 7.0582e-03 | 7.5800e-01 | 9.8330e-05 |
| NaN        | NaN        | NaN        | 5.7060e-01 | 6.2060e-02 | 6.4549e-02 |
| NaN        | NaN        | NaN        | NaN        | 2.1486e-02 | 1.9150e-01 |
| NaN        | NaN        | NaN        | NaN        | NaN        | 4.4000e-04 |

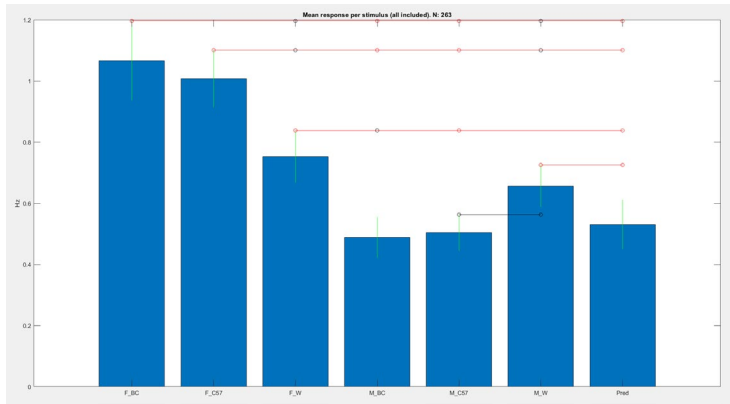

### Normalized values

|            |            |            |            |            |            |
|------------|------------|------------|------------|------------|------------|
| 9.5724e-01 | 1.0245e-04 | 5.1946e-11 | 4.6405e-12 | 1.0716e-05 | 2.0357e-11 |
| NaN        | 9.7523e-05 | 3.4643e-11 | 2.2034e-12 | 1.2952e-05 | 1.1092e-11 |
| NaN        | NaN        | 7.2395e-04 | 1.0153e-04 | 3.8758e-01 | 3.8312e-05 |
| NaN        | NaN        | NaN        | 5.2100e-01 | 1.8045e-02 | 1.3227e-01 |
| NaN        | NaN        | NaN        | NaN        | 3.1957e-03 | 3.3420e-01 |
| NaN        | NaN        | NaN        | NaN        | NaN        | 6.0055e-04 |

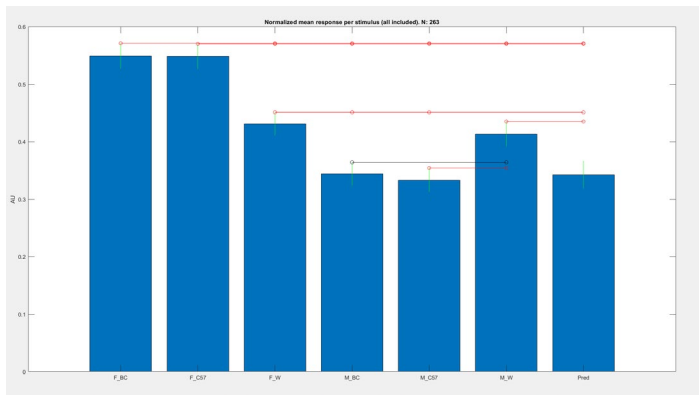

### Stimulus set 3. Subject strain: C57 + BC:

#### Raw responses

|            |            |            |            |            |            |
|------------|------------|------------|------------|------------|------------|
| 9.1777e-02 | 1.9229e-06 | 6.0373e-02 | 2.0299e-01 | 8.9205e-01 | 2.1292e-05 |
| NaN        | 8.0063e-04 | 1.8636e-04 | 1.8942e-03 | 5.8562e-02 | 1.9942e-10 |
| NaN        | NaN        | 3.8951e-12 | 1.9480e-10 | 1.2576e-07 | 2.2880e-21 |
| NaN        | NaN        | NaN        | 4.6047e-01 | 5.5658e-02 | 1.0480e-02 |
| NaN        | NaN        | NaN        | NaN        | 2.3766e-01 | 1.4616e-03 |
| NaN        | NaN        | NaN        | NaN        | NaN        | 1.1565e-05 |

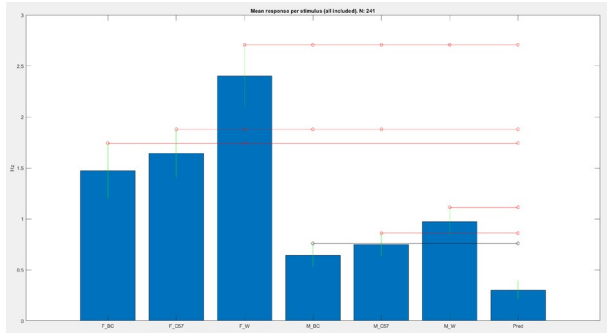

#### Normalized responses

|            |            |            |            |            |            |
|------------|------------|------------|------------|------------|------------|
| 1.1271e-02 | 1.4530e-15 | 1.1145e-02 | 6.3927e-02 | 7.6998e-01 | 5.1659e-08 |
| NaN        | 3.8553e-12 | 2.8528e-09 | 2.0656e-07 | 5.5768e-04 | 1.1148e-18 |
| NaN        | NaN        | 1.3474e-26 | 9.9109e-25 | 2.7405e-19 | 2.7794e-36 |
| NaN        | NaN        | NaN        | 4.5939e-01 | 7.8492e-03 | 1.4847e-03 |
| NaN        | NaN        | NaN        | NaN        | 6.6556e-02 | 5.6950e-05 |
| NaN        | NaN        | NaN        | NaN        | NaN        | 1.1523e-08 |

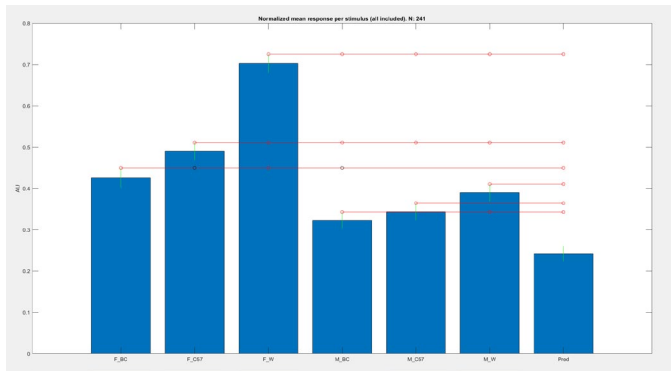

Supplement: 12915_2021_1064_MOESM2_ESM.pdf [file 12915_2021_1064_MOESM2_ESM.pdf]
