# Supplementary material for: Do all mice smell the same? Chemosensory cues from inbred and wild mouse strains elicit stereotypic sensory representations in the accessory olfactory bulb
Source: PubMed Central journal article supplement (PMC8240315; doi:10.1186/s12915-021-01064-7), 2021-06-28

# Additional Figure 1

BC Subjects (n = 188)

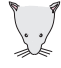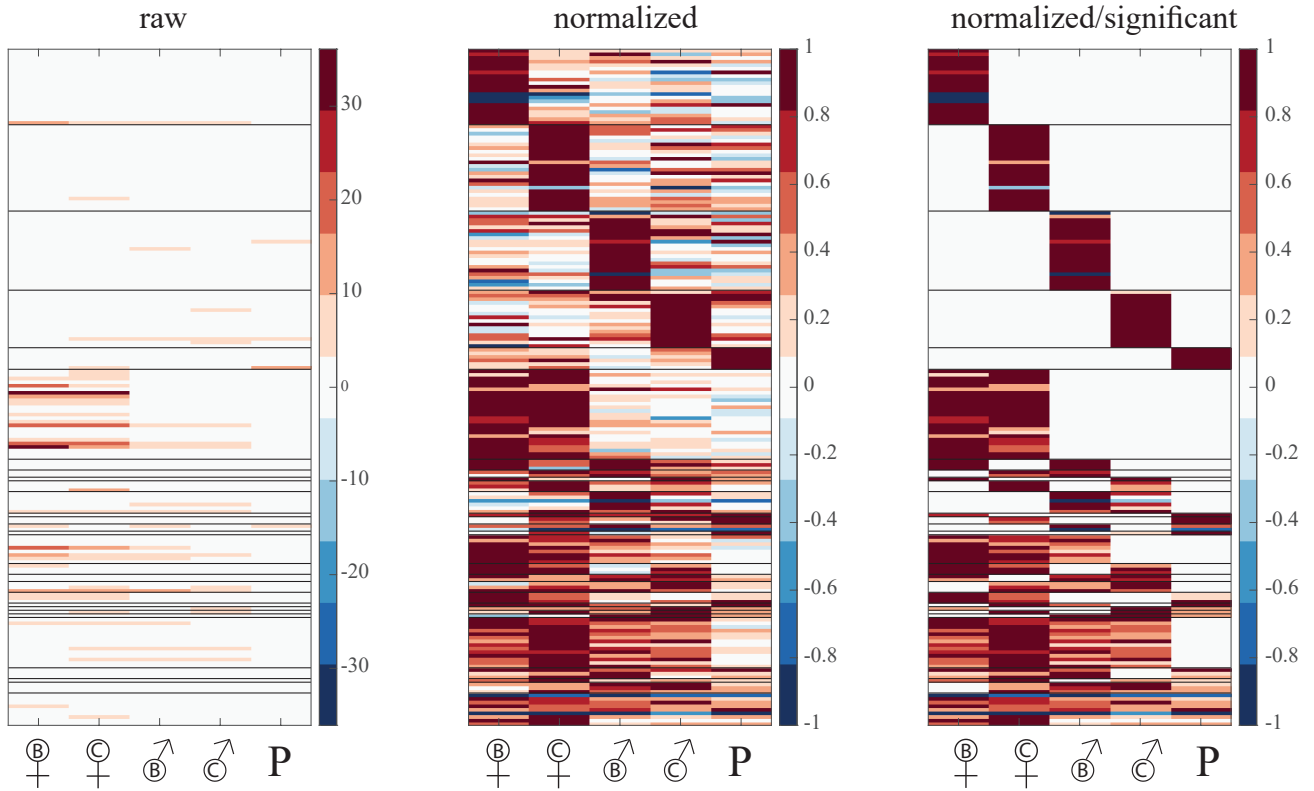

C57 Subjects (n = 245)

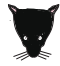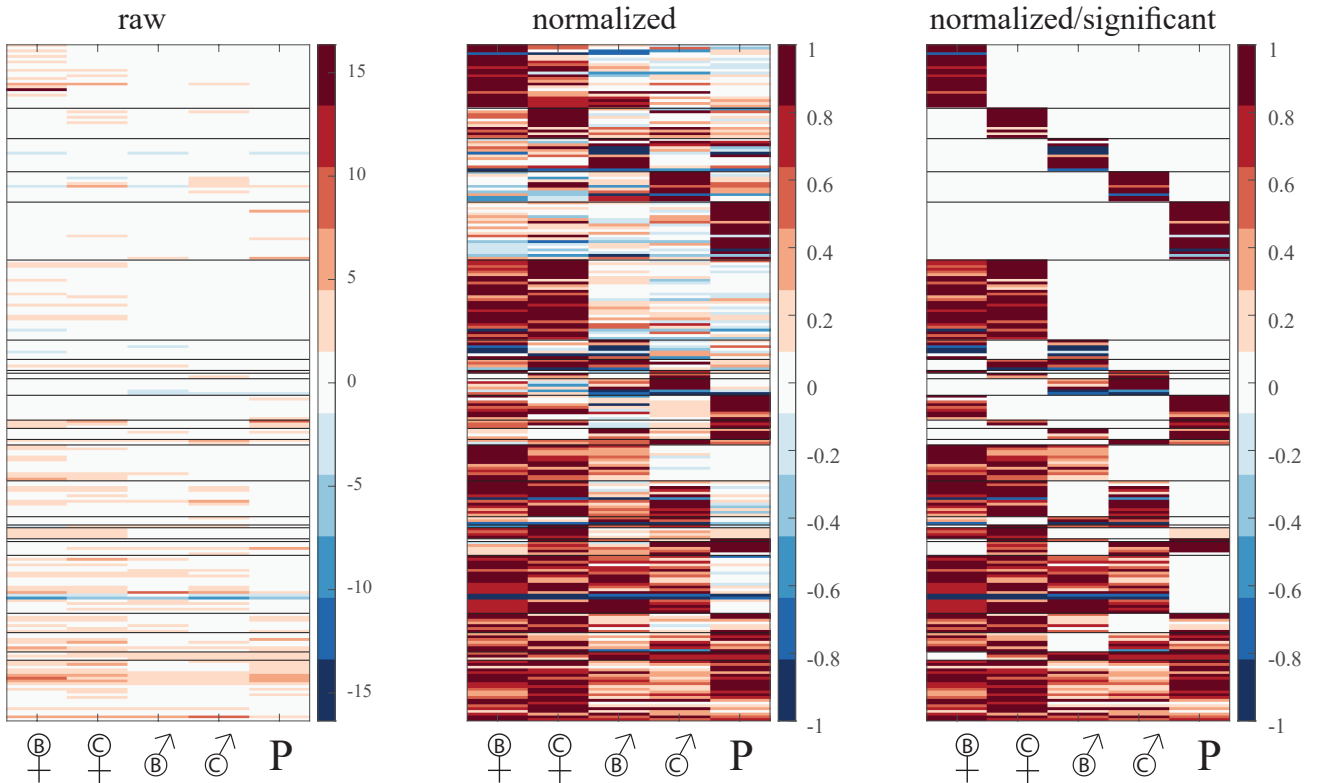

Supplement: 12915_2021_1064_MOESM1_ESM.pdf [file 12915_2021_1064_MOESM1_ESM.pdf]
