# Supplementary material for: Do all mice smell the same? Chemosensory cues from inbred and wild mouse strains elicit stereotypic sensory representations in the accessory olfactory bulb
Source: PubMed Central journal article supplement (PMC8240315; doi:10.1186/s12915-021-01064-7), 2021-06-28

# Additional Figure 3

## Population level distances for each strain

C57 neurons (N=245)

BC neurons (N=188)

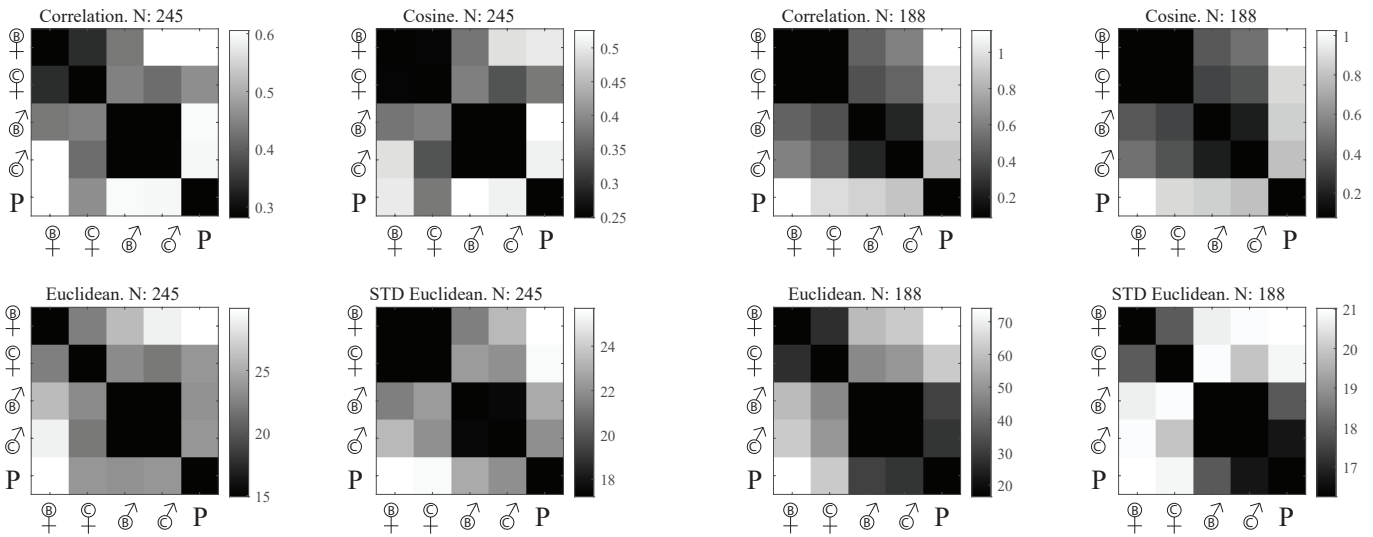

## Comparison of population level distances across the strains for 3 stimulus sets and 4 distance metrics

### population level distance (stim set 1)

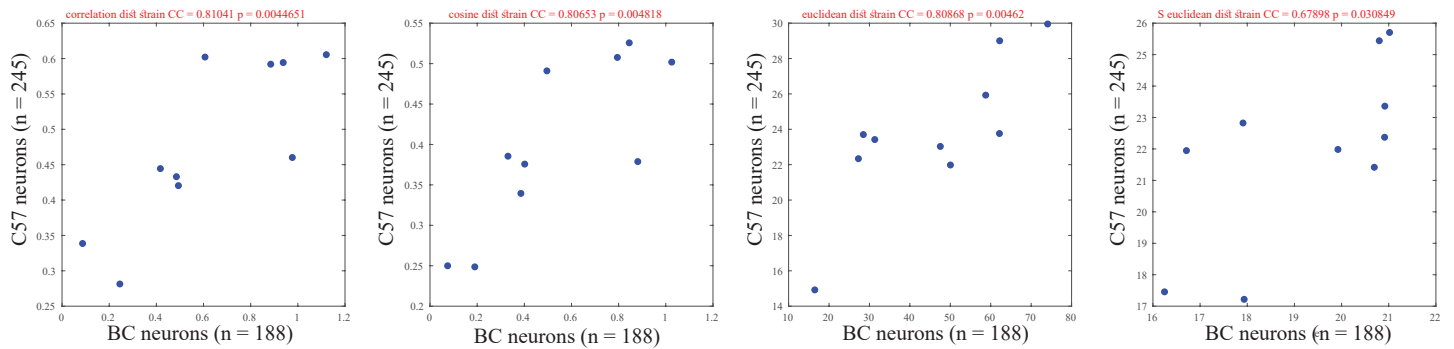

### population level distance (stim set 2)

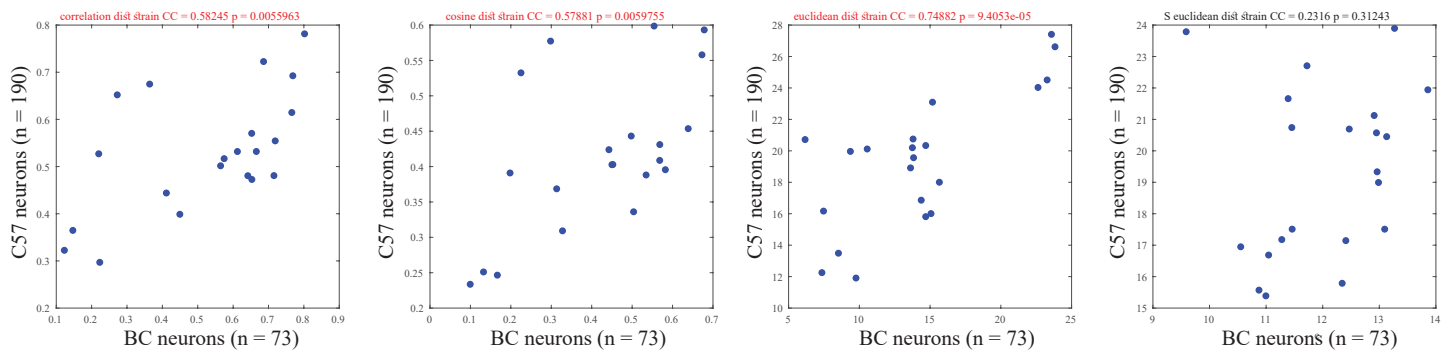

### population level distance (stim set 3)

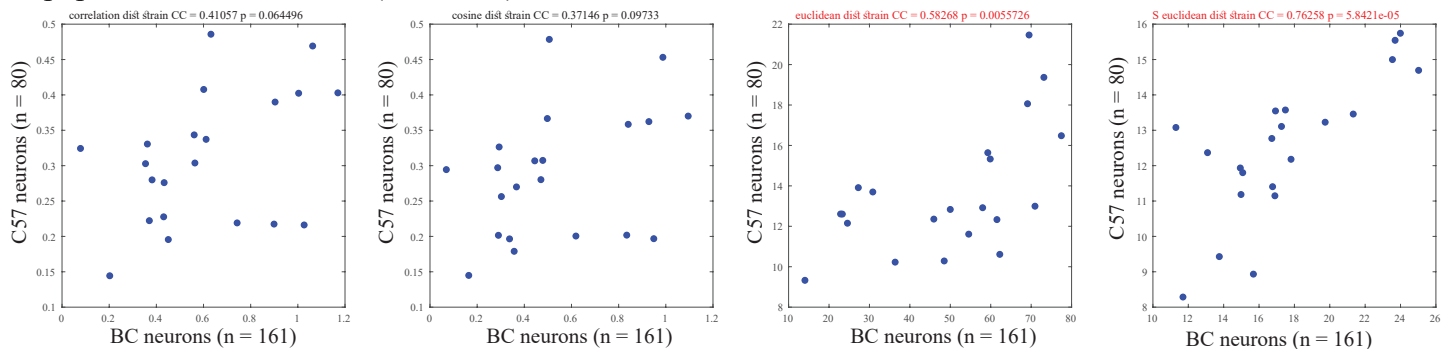

Supplement: 12915_2021_1064_MOESM3_ESM.pdf [file 12915_2021_1064_MOESM3_ESM.pdf]
